# Supplementary material for: 2LE-BO-DeepTrade: an integrated deep learning framework for stock price prediction
Source: PeerJ journal article supplement (doi:10.7717/peerj-cs.3107), 2025-08-08
Supplement: Supplementary_Information_(Reproducibility).pdf [file Supplementary_Information_%28Reproducibility%29.pdf]

## Reproducibility

**Computing Infrastructure:** The experiments were conducted on a system running Windows OS, with hardware configurations including an 12th Gen Intel(R) Core(TM) i9-12900K CPU, 32GB RAM, and an NVIDIA RTX A2000 GPU. We used Python 3.10 and TensorFlow 2.x for development and experiments.

**Model Description:** The model takes historical stock price data as input, performs denoising using 2LE-ICEEMDAN, trains a deep learning model to predict future prices, and outputs buy/sell signals based on a PLR trading strategy. Specifically, it optimizes hyperparameters to improve prediction accuracy and profitability.

**Evaluation Method:** The primary evaluation metrics used were statistical metrics (RMSE, MAE, MAPE, and R-squared) and profitability analysis via a PLR-based trading strategy.

**Assessment Metrics (Justification):** Statistical metrics and profitability analysis were chosen as evaluation metrics because they directly reflect the performance of the model and the convergence of the training process.

**Limitations/Validity:** We discussed the model's generalization capability across diverse stock datasets and its potential limitations. The model's effectiveness has been rigorously validated through extensive experimentation.

**Code and Data Availability:** The code used in this study is available at <https://github.com/aksehird/2LE-BO-DeepTrade/blob/main/2LE-BO-DeepTrade.py>."
